# Supplementary material for: Preoperative Cancer Antigen 125 Level as Predictor for Complete Cytoreduction in Ovarian Cancer: A Prospective Cohort Study and Systematic Review
Source: MDPI journal article supplement (doi:10.3390/cancers14235734), 2022-11-22
Supplement: s1 [file s1]

## Supporting information CA-125 manuscript

**Table S1. The searching strings**

| Database              |                                                                                                                                                                                                                                                                                                                                                                                                                                                                                                                                                                                                                                                                                                                                                                      |
|-----------------------|----------------------------------------------------------------------------------------------------------------------------------------------------------------------------------------------------------------------------------------------------------------------------------------------------------------------------------------------------------------------------------------------------------------------------------------------------------------------------------------------------------------------------------------------------------------------------------------------------------------------------------------------------------------------------------------------------------------------------------------------------------------------|
| <b>Embase.com</b>     | ('ovary carcinoma'/exp OR ('ovary tumor'/de AND ('carcinoma'/de OR 'adenocarcinoma'/de)) OR (((epithelial* OR mucinous* OR serous* OR endometrioid*) NEAR/6 (ovar*) NEAR/6 (carcinoma* OR adenocarcinoma*))) :ab,ti,kw) AND ('cytoreductive surgery'/de OR (cytoreduc* OR debulking*) :ab,ti,kw) AND ('CA 125 antigen'/de OR 'cancer antigen 125'/de OR 'carcinoembryonic antigen'/de OR (ca-125 OR ca125 OR cancer-antigen-125 OR cancer-antigen125 OR carcinoembryonic-antigen* OR CEA OR Mucin-16*) :ab,ti,kw) AND (((advanced OR 2b OR 2c OR 3 OR 3a OR 3b OR 3c OR 4 OR iib OR iic OR iii OR iiia OR iiib OR iiic OR iv OR 2-b OR 2-c OR 3-a OR 3-b OR 3-c OR ii-b OR ii-c OR iii-a OR iii-b OR iii-c) NEAR/3 (stag*))) :ab,ti,kw NOT [conference abstract]/lim |
| <b>Medline Ovid</b>   | (Carcinoma, Ovarian Epithelial/ OR (((epithelial* OR mucinous* OR serous* OR endometrioid*) ADJ6 (ovar*) ADJ6 (carcinoma* OR adenocarcinoma*))) :ab,ti,kf.) AND (Cytoreduction Surgical Procedures/ OR (cytoreduc* OR debulking*) :ab,ti,kf.) AND (CA-125 Antigen/ OR (ca-125 OR ca125 OR cancer-antigen-125 OR cancer-antigen125 OR carcinoembryonic-antigen* OR CEA OR Mucin-16*) :ab,ti,kf.) AND (((advanced OR 2b OR 2c OR 3 OR 3a OR 3b OR 3c OR 4 OR iib OR iic OR iii OR iiia OR iiib OR iiic OR iv OR 2-b OR 2-c OR 3-a OR 3-b OR 3-c OR ii-b OR ii-c OR iii-a OR iii-b OR iii-c) ADJ3 (stag*))) :ab,ti,kf. NOT (letter* OR news OR comment* OR editorial* OR congres* OR abstract* OR book* OR chapter* OR dissertation abstract*) :pt.                     |
| <b>Web of science</b> | TS=((((epithelial* OR mucinous* OR serous* OR endometrioid*) NEAR/5 (ovar*) NEAR/5 (carcinoma* OR adenocarcinoma*))) AND ((cytoreduc* OR debulking*)) AND ((ca-125 OR ca125 OR cancer-antigen-125 OR cancer-antigen125 OR carcinoembryonic-antigen* OR CEA OR Mucin-16*)) AND (((advanced OR 2b OR 2c OR 3 OR 3a OR 3b OR 3c OR 4 OR iib OR iic OR iii OR iiia OR iiib OR iiic OR iv OR 2-b OR 2-c OR 3-                                                                                                                                                                                                                                                                                                                                                             |

|                         |                                                                                                                                                                                                                                                                                                                                                                                                                                                                                                                                                                                                             |
|-------------------------|-------------------------------------------------------------------------------------------------------------------------------------------------------------------------------------------------------------------------------------------------------------------------------------------------------------------------------------------------------------------------------------------------------------------------------------------------------------------------------------------------------------------------------------------------------------------------------------------------------------|
|                         | a OR 3-b OR 3-c OR ii-b OR ii-c OR iii-a OR iii-b OR iii-c) NEAR/2 (stag*))))                                                                                                                                                                                                                                                                                                                                                                                                                                                                                                                               |
| <b>Cochrane Central</b> | (((((epithelial* OR mucinous* OR serous* OR endometrioid*) NEAR/6 (ovar*) NEAR/6 (carcinoma* OR adenocarcinoma*))) :ab,ti,kw) AND ((cytoreduc* OR debulking*) :ab,ti,kw) AND ((ca NEXT 125 OR ca125 OR cancer NEXT antigen NEXT 125 OR cancer NEXT antigen125 OR carcinoembryonic NEXT antigen* OR CEA OR Mucin NEXT 16*) :ab,ti,kw) AND (((advanced OR 2b OR 2c OR 3 OR 3a OR 3b OR 3c OR 4 OR iib OR iic OR iii OR iiia OR iiib OR iiic OR iv OR 2 NEXT b OR 2 NEXT c OR 3 NEXT a OR 3 NEXT b OR 3 NEXT c OR ii NEXT b OR ii NEXT c OR iii NEXT a OR iii NEXT b OR iii NEXT c) NEAR/3 (stag*))) :ab,ti,kw |
| <b>Google Scholar</b>   | “epithelial ovarian carcinoma adenocarcinoma” cytoreductive debulking “ca 125” ca125 “carcinoembryonic antigen” CEA “advanced 2b 2c 3a 3b 3c 4 stage staging”                                                                                                                                                                                                                                                                                                                                                                                                                                               |

**Table S2. Detailed methods of each platform used to analyze CA-125**

|                          | <b>Roche</b> | <b>Abbott</b>   | <b>Beckman Coulter</b> | <b>Siemens</b> | <b>Thermo Fischer</b> |
|--------------------------|--------------|-----------------|------------------------|----------------|-----------------------|
| <b>Platform</b>          | E601, E801   | Architect i2000 | DxI 800                | Centaur        | Kryptor Compact       |
| <b>Method</b>            | ECLIA        | MEIA            | CLEIA                  | CLEIA          | TRACE                 |
| <b>Signal technology</b> | Ruthenium    | AP              | AP                     | Acrid-Fluor    | Cryp-Acc              |

ECLIA = Electro-Chemiluminescent Immuno Assay; MEIA = Microparticle Enzyme Immuno Assay; CLEIA = Chemiluminiscent Enzyme Immuno Assay; AP = Alkaline Phosphatase; Acrid-Fluor = Acridinium-Fluorescein; TRACE = Time Resolved Amplified Cryptate Emission; Cryp-Acc = Cryptate-Acc

**Table S3. Outcome of quality assessment**

|                                          | Study participation | Prognostic factor measurement | Outcome measurement | Study confounding | Statistical analysis and reporting | Total  |
|------------------------------------------|---------------------|-------------------------------|---------------------|-------------------|------------------------------------|--------|
| <i>Eltabbakh et al.</i> <sup>(25)</sup>  | Green               | Yellow                        | Green               | Green             | Green                              | Green  |
| <i>Risum et al.</i> <sup>(33)</sup>      | Yellow              | Yellow                        | Green               | Yellow            | Yellow                             | Yellow |
| <i>Rodriguez et al.</i> <sup>(30)</sup>  | Green               | Green                         | Green               | Green             | Yellow                             | Green  |
| <i>Furukawa et al.</i> <sup>(29)</sup>   | Yellow              | Green                         | Green               | Green             | Green                              | Green  |
| <i>Jung et al.</i> <sup>(24)</sup>       | Green               | Yellow                        | Green               | Yellow            | Green                              | Green  |
| <i>Pelissier et al.</i> <sup>(28)</sup>  | Green               | Green                         | Green               | Green             | Green                              | Green  |
| <i>Karlsen et al.</i> <sup>(23)</sup>    | Green               | Green                         | Green               | Green             | Green                              | Green  |
| <i>Morimoto et al.</i> <sup>(34)</sup>   | Green               | Yellow                        | Yellow              | Yellow            | Green                              | Yellow |
| <i>Zeng et al.</i> <sup>(6)</sup>        | Green               | Green                         | Green               | Green             | Green                              | Green  |
| <i>Matsuhashi et al.</i> <sup>(27)</sup> | Green               | Green                         | Yellow              | Yellow            | Green                              | Green  |
| <i>Ghisoni et al.</i> <sup>(31)</sup>    | Green               | Yellow                        | Yellow              | Green             | Green                              | Green  |
| <i>Gupta et al.</i> <sup>(26)</sup>      | Green               | Green                         | Green               | Green             | Yellow                             | Green  |
| <i>Nakamura et al.</i> <sup>(32)</sup>   | Green               | Yellow                        | Green               | Yellow            | Green                              | Green  |
| <i>Merlo et al.</i> <sup>(35)</sup>      | Green               | Yellow                        | Green               | Yellow            | Yellow                             | Yellow |

Green = low risk of bias; Yellow = moderate risk of bias

**Table S4. Univariable analysis of factors predicting normal levels of preoperative CA-125 before primary CRS**

|                                                       | Preoperative<br>CA-125 ≤35 kU/L<br>(n=4, 9.1%) | Preoperative<br>CA-125 >35 kU/L<br>(n=40, 90.9%) | Unadjusted OR<br>[95%CI] | P-value |
|-------------------------------------------------------|------------------------------------------------|--------------------------------------------------|--------------------------|---------|
| Median AGE (IQR), years                               | 66 (22)                                        | 59 (17)                                          | 1.07 [0.96-1.20]         | 0.208   |
| Median BMI (IQR), kg/m <sup>2</sup>                   | 22.2 (7.5)                                     | 24.8 (6.7)                                       | 0.89 [0.69-1.15]         | 0.373   |
| WHO performance, n (%)                                |                                                |                                                  |                          |         |
| 0 (ref)                                               | 4 (100.0)                                      | 25 (62.5)                                        |                          |         |
| 1                                                     | 0 (0.0)                                        | 11 (27.5)                                        | N/A*                     | N/A*    |
| ≥2                                                    | 0 (0.0)                                        | 3 (7.5)                                          | N/A*                     | N/A*    |
| FIGO stage, n (%)                                     |                                                |                                                  |                          |         |
| IIIB/IIIC (ref)                                       | 4 (100.0)                                      | 37 (92.5)                                        |                          |         |
| IV                                                    | 0 (0.0)                                        | 3 (7.5)                                          | N/A*                     | N/A*    |
| Histology, n (%)                                      |                                                |                                                  |                          |         |
| Serous (ref)                                          | 3 (75.0)                                       | 39 (97.5)                                        |                          |         |
| Non-serous                                            | 1 (25.0)                                       | 1 (2.5)                                          | 13.00 [0.64-263.82]      | 0.095   |
| Presence of peritoneal<br>carcinomatosis on CT, n (%) | 2 (50.0)                                       | 22 (55.0)                                        | 0.82 [0.11-6.40]         | 0.848   |
| Presence of ascites, n (%)                            | 1 (25.0)                                       | 30 (75.0)                                        | 0.11 [0.01-1.19]         | 0.070   |
| Median ascites (IQR), ml                              | 20 (-)                                         | 400 (700)                                        | 0.94 [0.76-1.17]         | 0.570   |
| Presence of peritoneal<br>carcinomatosis, n (%)       | 1 (25.0)                                       | 18 (45.0)                                        | 0.41 [0.04-4.26]         | 0.453   |
| Surgical outcome, n (%)                               |                                                |                                                  |                          |         |
| Complete CRS                                          | 4 (100.0)                                      | 28 (70.0)                                        | N/A*                     | N/A*    |
| Non-complete CRS (ref)                                | 0 (0.0)                                        | 12 (30.0)                                        |                          |         |

CA-125 = Cancer Antigen 125, CI = confidence interval, CRS = cytoreductive surgery, IQR = interquartile range, N/A = not applicable, OR= odds ratio, REF = reference

\* = odds-ratio or P-value could not be calculated

**Table S5. Univariable analysis of factors predicting normalized preoperative CA-125 level before interval CRS**

|                                                               | Preoperative<br>CA-125 ≤35 kU/L<br>(n=85, 30.8%) | Preoperative<br>CA-125 >35 kU/L<br>(n=191, 69.2%) | Unadjusted OR<br>[95%CI] | P-value |
|---------------------------------------------------------------|--------------------------------------------------|---------------------------------------------------|--------------------------|---------|
| Median AGE (IQR), years                                       | 68 (14)                                          | 67 (12)                                           | 1.00 [0.98-1.03]         | 0.884   |
| Median BMI (IQR), kg/m <sup>2</sup>                           | 24.6 (5.8)                                       | 24.5 (6.0)                                        | 1.00 [0.95-1.06]         | 0.905   |
| WHO performance, n (%)                                        |                                                  |                                                   |                          |         |
| 0 (ref)                                                       | 48 (60.0)                                        | 93 (52.0)                                         |                          |         |
| 1                                                             | 29 (36.3)                                        | 67 (37.4)                                         | 0.84 [0.48-1.466]        | 0.536   |
| ≥2                                                            | 3 (3.8)                                          | 19 (10.6)                                         | 0.31 [0.09-1.09]         | 0.067   |
| FIGO stage, n (%)                                             |                                                  |                                                   |                          |         |
| IIIB/IIIC (ref)                                               | 56 (65.9)                                        | 124 (64.9)                                        |                          |         |
| IV                                                            | 29 (34.1)                                        | 67 (35.1)                                         | 0.96 [0.56-1.64]         | 0.877   |
| Histology, n (%)                                              |                                                  |                                                   |                          |         |
| Serous (ref)                                                  | 84 (98.8)                                        | 183 (95.8)                                        |                          |         |
| Non-serous                                                    | 1 (1.2)                                          | 8 (4.2)                                           | 0.27 [0.03-2.21]         | 0.224   |
| Presence of ascites/peritoneal<br>carcinomatosis on CT, n (%) | 57 (67.1)                                        | 140 (73.3)                                        | 0.74 [0.43-1.29]         | 0.291   |
| Presence of ascites, n (%)                                    | 11 (12.9)                                        | 70 (36.6)                                         | 0.25 [0.13-0.50]         | <0.001  |
| Median ascites (IQR), ml                                      | 100 (185)                                        | 200 (300)                                         | 1.00 [0.99-1.00]         | 0.228   |
| Presence of peritoneal<br>carcinomatosis, n (%)               | 20 (23.5)                                        | 93 (48.7)                                         | 0.31 [0.18-0.55]         | <0.001  |
| Surgical outcome, n (%)                                       |                                                  |                                                   |                          |         |
| Complete CRS                                                  | 72 (84.7)                                        | 127 (66.5)                                        | 2.79 [1.44-5.41]         | 0.002   |
| Non-complete CRS (ref)                                        | 13 (15.3)                                        | 64 (33.5)                                         |                          |         |

CA-125 = Cancer Antigen 125, CI = confidence interval, CRS = cytoreductive surgery, IQR = interquartile range, OR= odds ratio, REF = reference

**Table S6. Univariable analysis of factors predicting >95% reduction in CA-125 after NAC**

|                                                       | >95% decrease in<br>preoperative CA-125<br>(n=81, 29.6%) | ≤95% decrease in<br>preoperative CA-<br>125<br>(n=193, 70.4%) | Unadjusted OR<br>[95%CI] | P-value |
|-------------------------------------------------------|----------------------------------------------------------|---------------------------------------------------------------|--------------------------|---------|
| Median AGE (IQR), years                               | 66 (15)                                                  | 68 (12)                                                       | 0.98 [0.96-1.01]         | 0.251   |
| Median BMI (IQR), kg/m <sup>2</sup>                   | 24.5 (5.3)                                               | 24.6 (6.3)                                                    | 0.97 [0.91-1.02]         | 0.228   |
| WHO performance, n (%)                                |                                                          |                                                               |                          |         |
| 0 (ref)                                               | 50 (61.7)                                                | 89 (46.1)                                                     |                          |         |
| 1                                                     | 23 (28.4)                                                | 73 (37.8)                                                     | 0.56 [0.31-1.00]         | 0.052   |
| ≥2                                                    | 4 (4.9)                                                  | 18 (9.3)                                                      | 0.40 [0.13-1.23]         | 0.110   |
| FIGO stage, n (%)                                     |                                                          |                                                               |                          |         |
| IIIB/IIIC (ref)                                       | 50 (61.7)                                                | 128 (66.3)                                                    |                          |         |
| IV                                                    | 31 (38.3)                                                | 65 (33.7)                                                     | 1.22 [0.71-2.09]         | 0.467   |
| Histology, n (%)                                      |                                                          |                                                               |                          |         |
| Serous (ref)                                          | 79 (97.5)                                                | 186 (96.4)                                                    |                          |         |
| Non-serous                                            | 2 (2.5)                                                  | 7 (3.6)                                                       | 0.67 [0.14-3.31]         | 0.626   |
| Presence of peritoneal<br>carcinomatosis on CT, n (%) | 57 (70.4)                                                | 138 (71.5)                                                    | 0.95 [0.54-1.67]         | 0.850   |
| Presence of ascites, n (%)                            | 15 (18.5)                                                | 66 (34.2)                                                     | 0.44 [0.23-0.83]         | 0.011   |
| Median ascites (IQR), ml                              | 200 (200)                                                | 200 (300)                                                     | 1.00 [1.00-1.001]        | 0.459   |
| Presence of peritoneal<br>carcinomatosis, n (%)       | 30 (37.0)                                                | 83 (43.0)                                                     | 0.77 [0.45-1.32]         | 0.347   |
| Surgical outcome, n (%)                               |                                                          |                                                               |                          |         |
| Complete CRS                                          | 61 (75.3)                                                | 136 (70.5)                                                    | 1.28 [0.71-2.31]         | 0.416   |
| Non-complete CRS (ref)                                | 20 (24.7)                                                | 57 (29.5)                                                     |                          |         |

CA-125 = Cancer Antigen 125, CI = confidence interval, CRS = cytoreductive surgery, IQR = interquartile range, OR= odds ratio, REF = reference

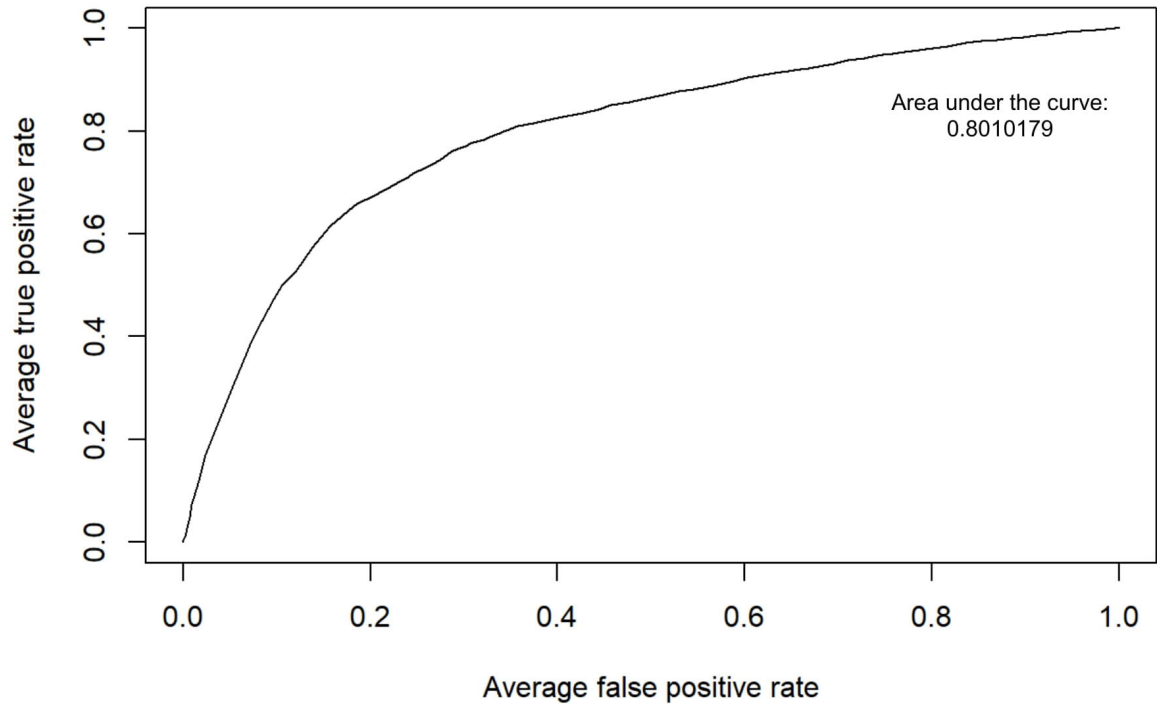

Figure S1. cross-validated ROC-curve for primary CRS.

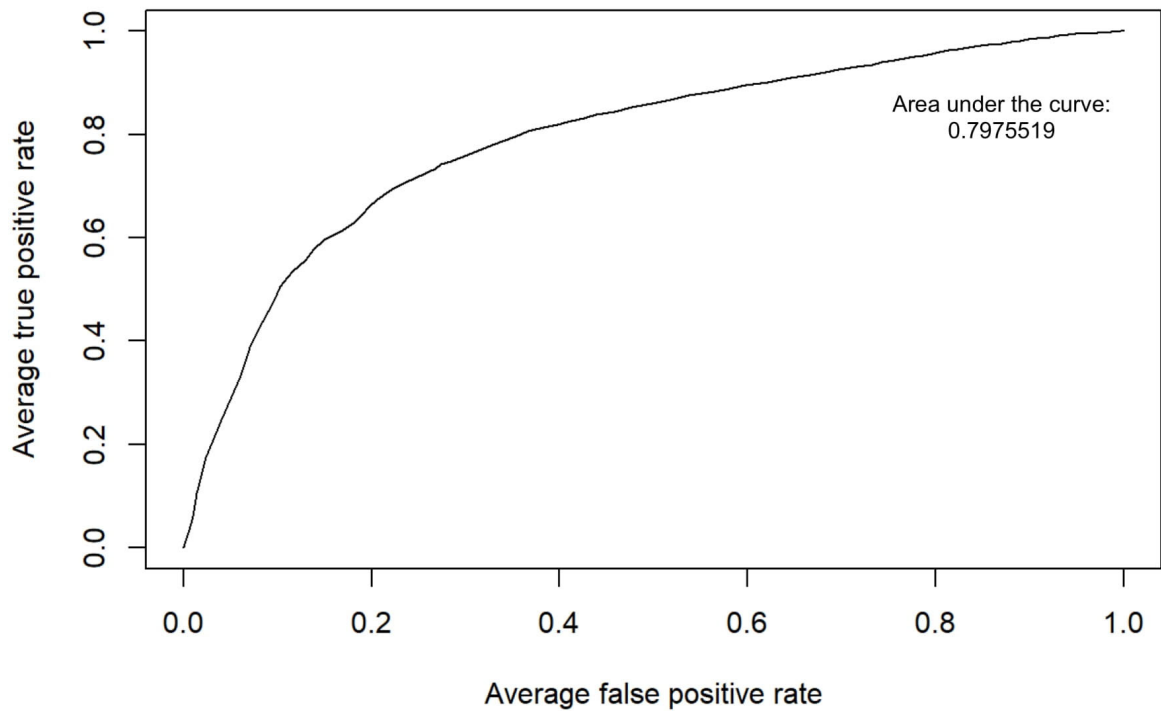

Figure S2: cross-validated ROC-curve for interval CRS.
